# Supplementary material
Source: publisher figshare collection journal article supplement (https://acs.figshare.com/ndownloader/files/4424275)

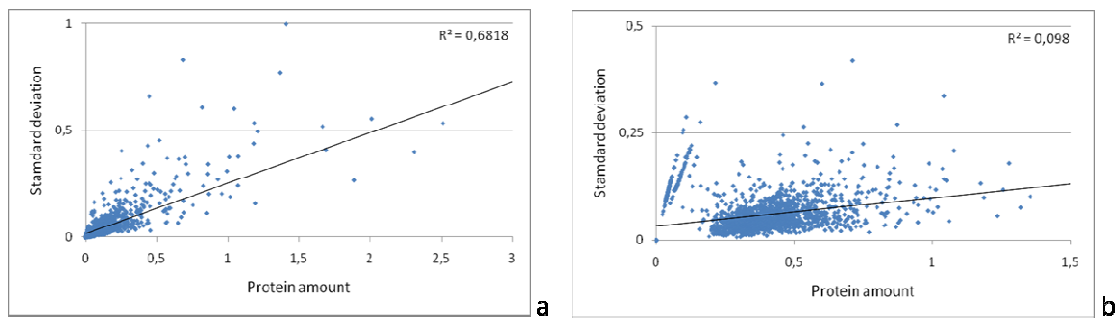

**Figure S1:** Relationship between the mean of protein amount and standard deviation of spots before (a) and after (b) transformation of normalized spot values.

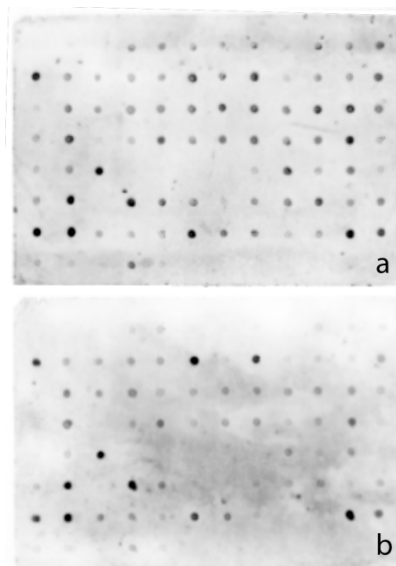

**Figure S2:** Representative dot blot hybridization of array 2 employing immature (a) or mature (b) testers obtained from total RNA, which shows differential expression of tested probes.

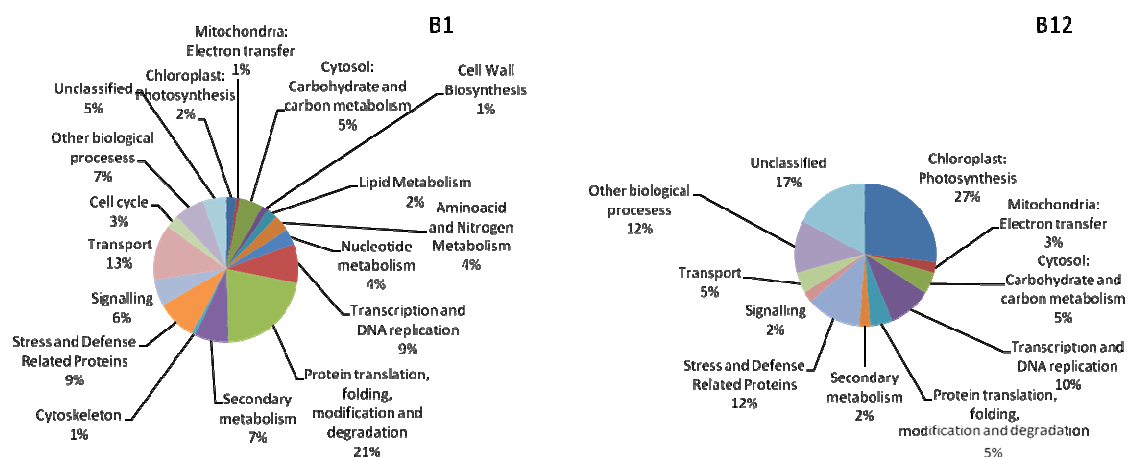

**Figure S3:** Classification of the non redundant genes present in immature (B1) and mature (B12) needles subtractive libraries; the ontology classification was determined for biological process/metabolic pathway according to KEGG. Relative proportions of each ontology terms are expressed.

**Figure S4:** Single-peptide spectra corresponding to de identification of spot 0109.

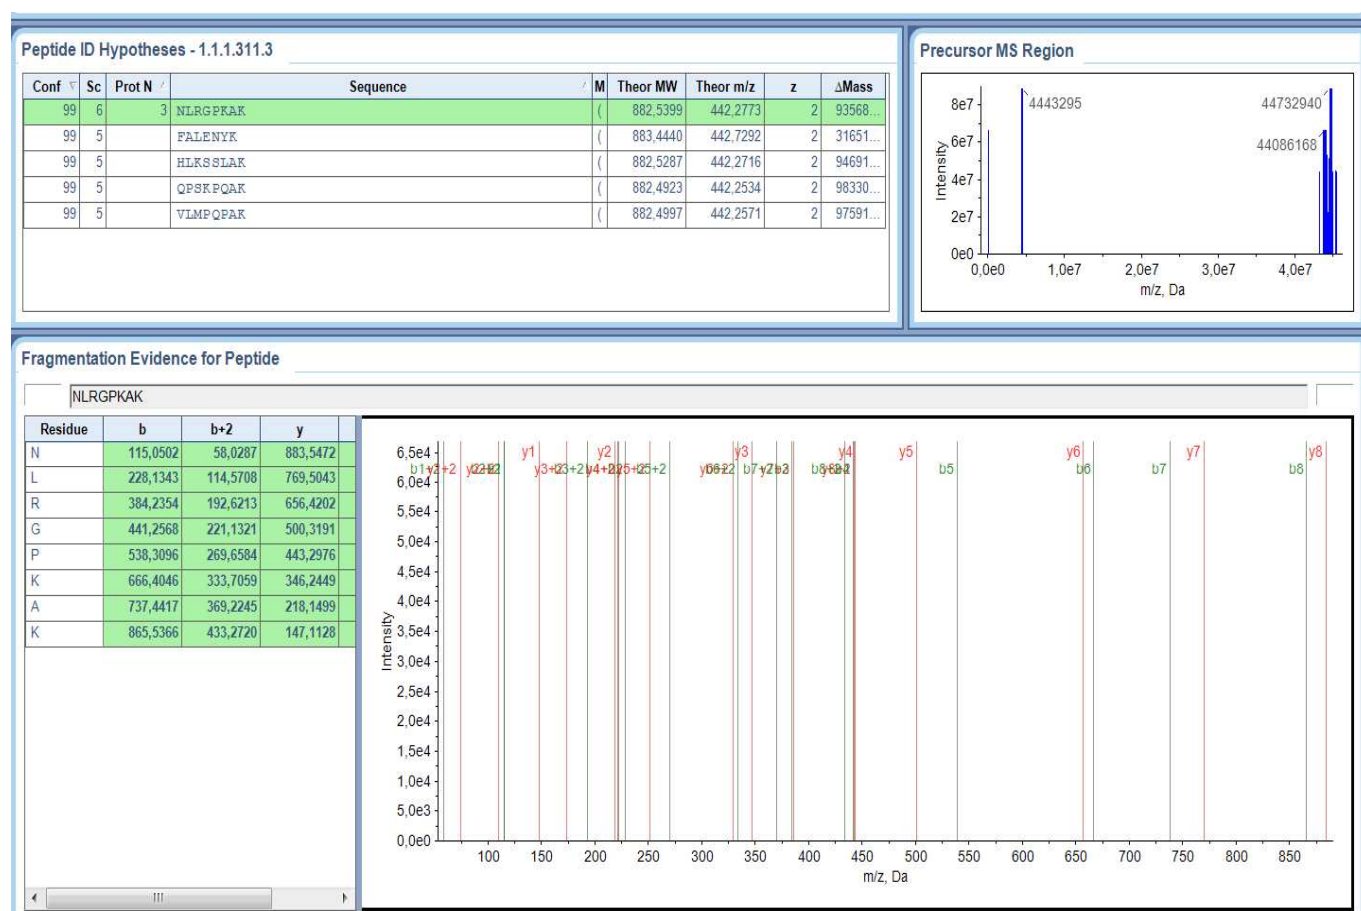

Figure S5: Single-peptide spectra corresponding to de identification of spot 2006.

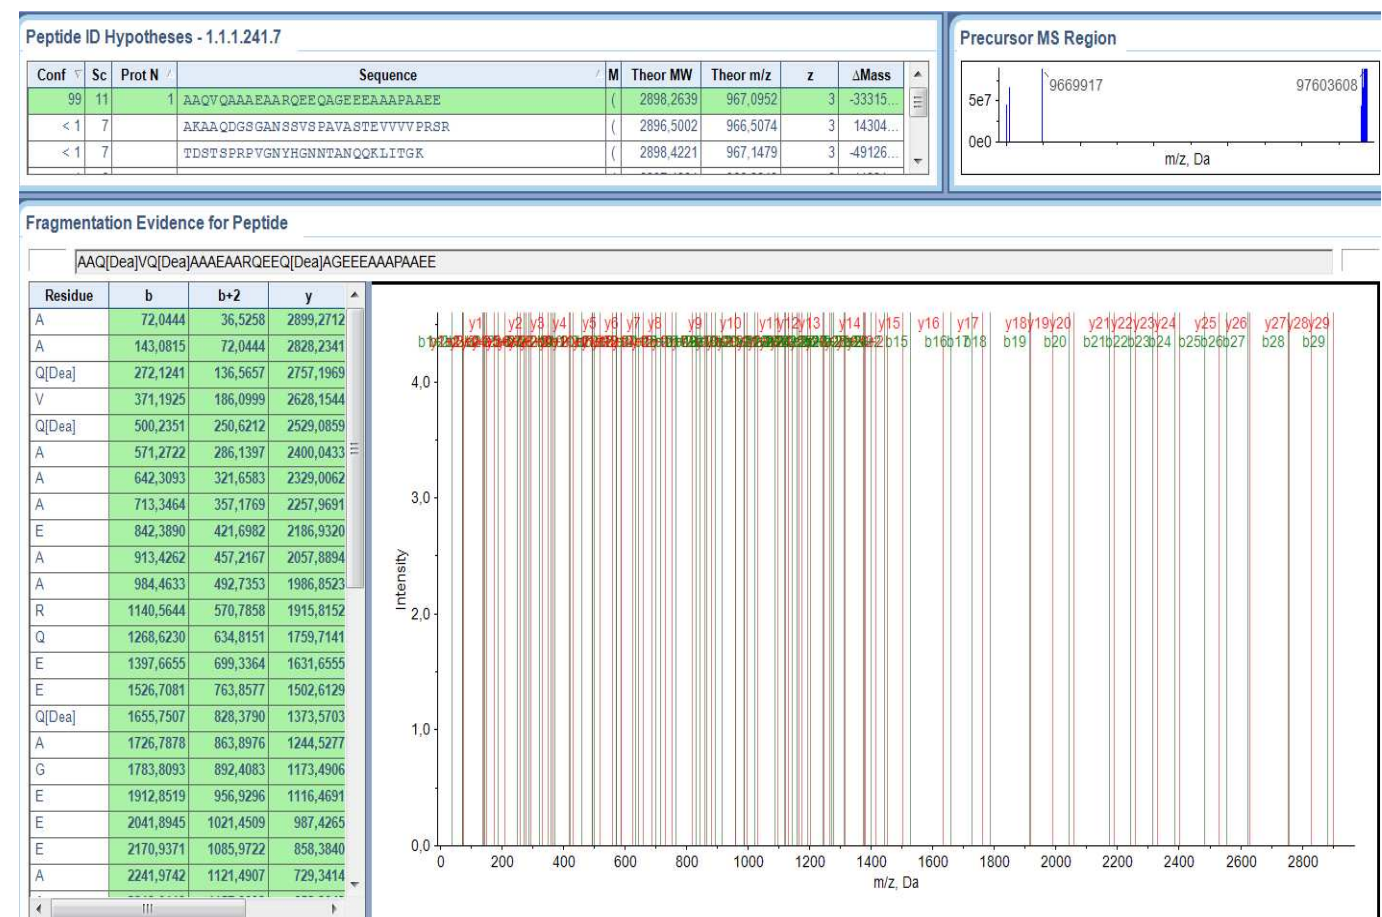

Figure S6: Single-peptide spectra corresponding to de identification of spot 2007.

# Peptide ID Hypotheses - 1.1.1.390.4

| Conf | Sc | Prot N | Sequence          | M | Theor MW  | Theor m/z | z | ΔMass   |
|------|----|--------|-------------------|---|-----------|-----------|---|---------|
| 99   | 5  | 1      | MAKNARRPPN(L)NVPK | ( | 1705.9410 | 569.6543  | 3 | 48218.3 |

## Precursor MS Region

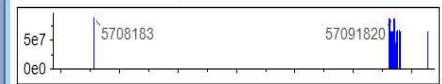

## Fragmentation Evidence for Peptide

MAKNARRPPN(Dea)LNVPK

| Residue | b         | b+2      | y         |
|---------|-----------|----------|-----------|
| M       | 132,0478  | 66,5275  | 1706,9483 |
| A       | 203,0849  | 102,0461 | 1575,9078 |
| K       | 331,1798  | 166,0936 | 1504,8707 |
| N       | 445,2228  | 223,1150 | 1376,7757 |
| A       | 516,2599  | 258,6336 | 1262,7328 |
| R       | 672,3610  | 336,6841 | 1191,6957 |
| R       | 828,4621  | 414,7347 | 1035,5946 |
| P       | 925,5149  | 463,2611 | 879,4934  |
| P       | 1022,5676 | 511,7875 | 782,4407  |
| N(Dea)  | 1137,5946 | 569,3009 | 685,3879  |
| L       | 1250,6786 | 625,8430 | 570,3610  |
| N       | 1364,7216 | 682,8644 | 457,2769  |
| V       | 1463,7900 | 732,3986 | 343,2340  |
| P       | 1560,8427 | 780,9250 | 244,1656  |
| K       | 1688,9377 | 844,9725 | 147,1128  |

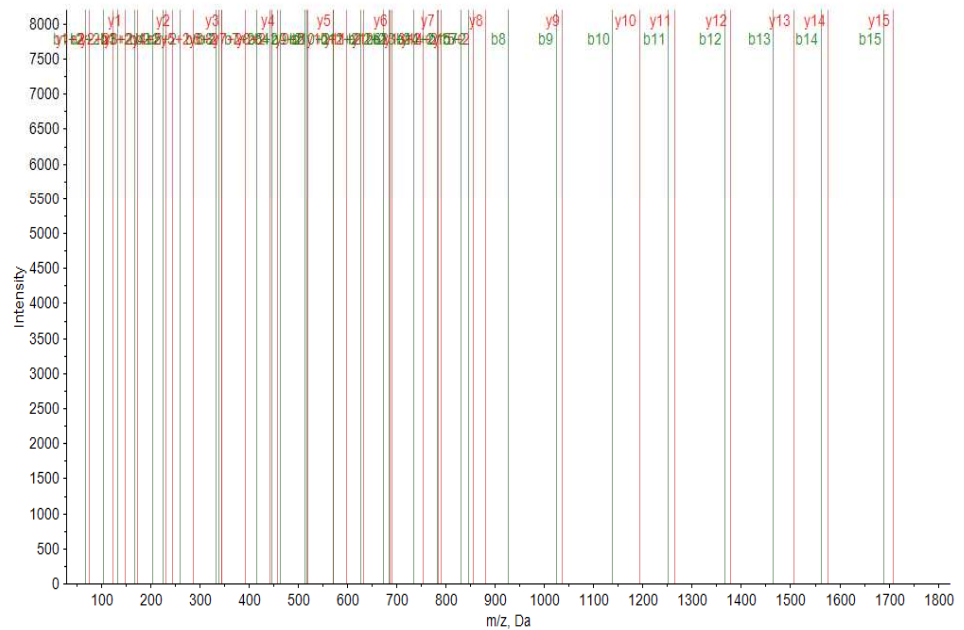

Figure S7: Single-peptide spectra corresponding to de identification of spot 3611.

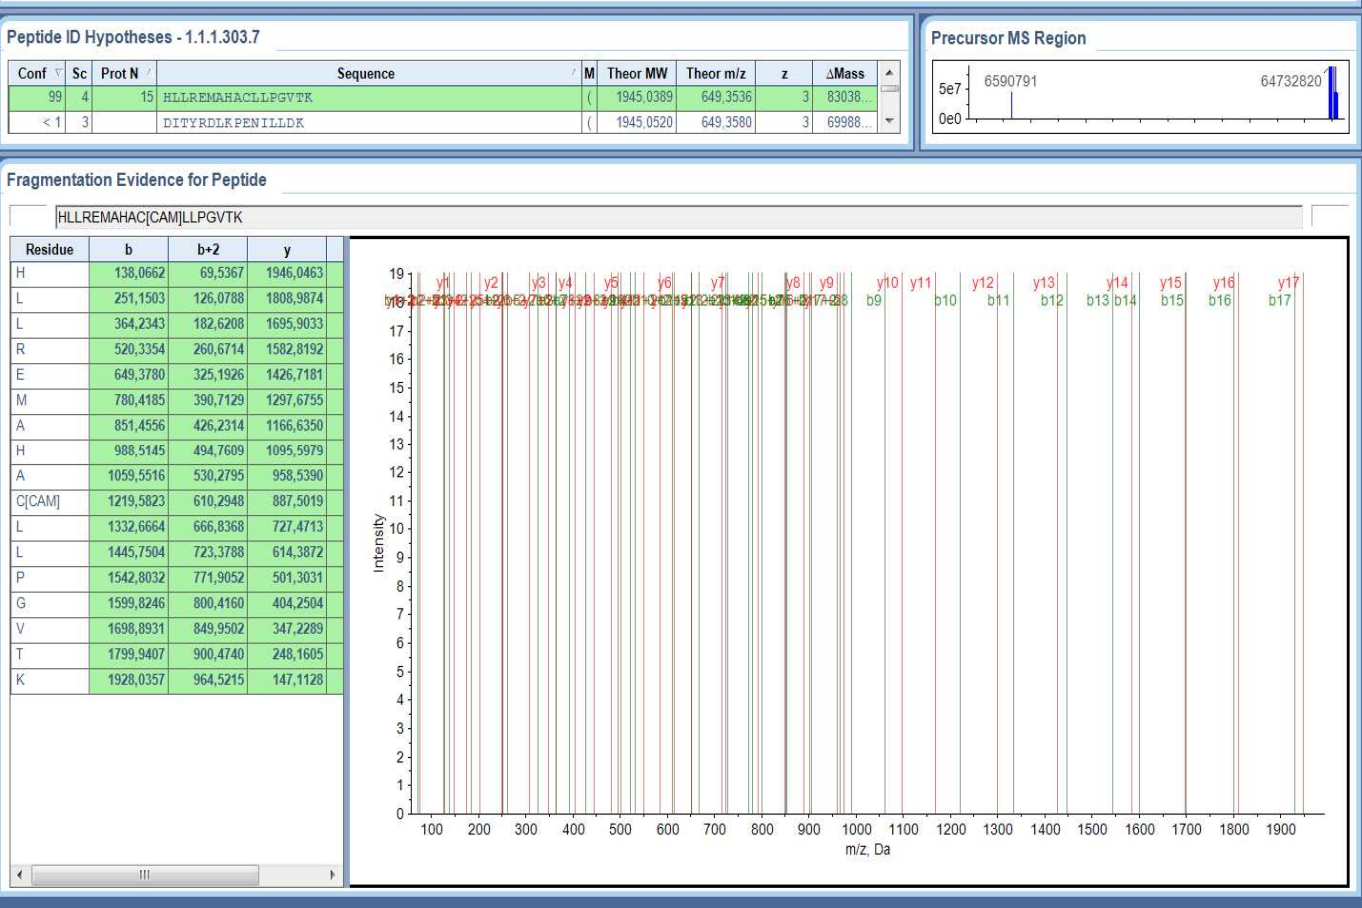

Figure S8: Single-peptide spectra corresponding to de identification of spot 5404.

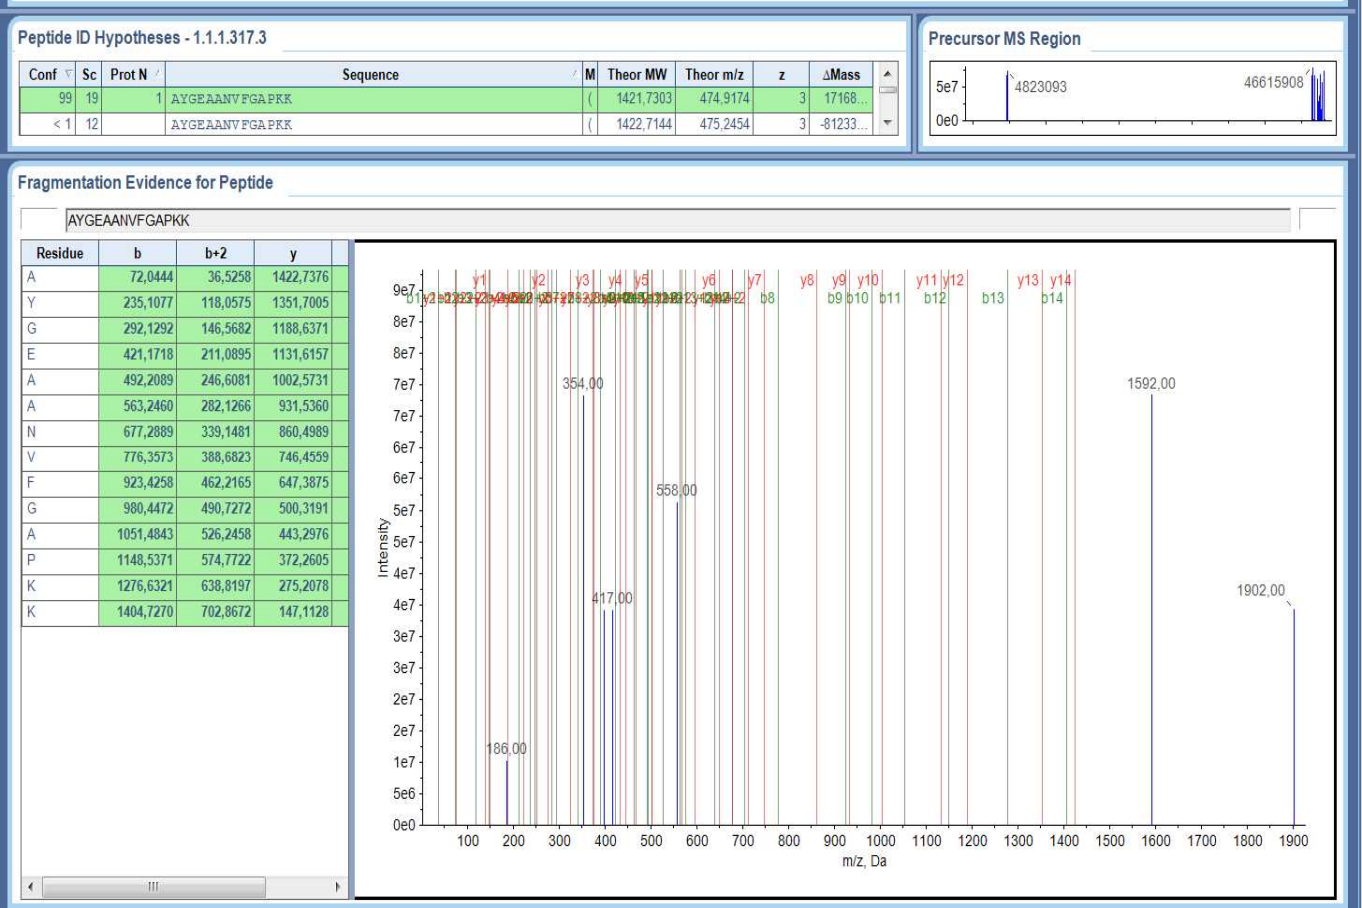

Figure S9: Single-peptide spectra corresponding to de identification of spot 6001.

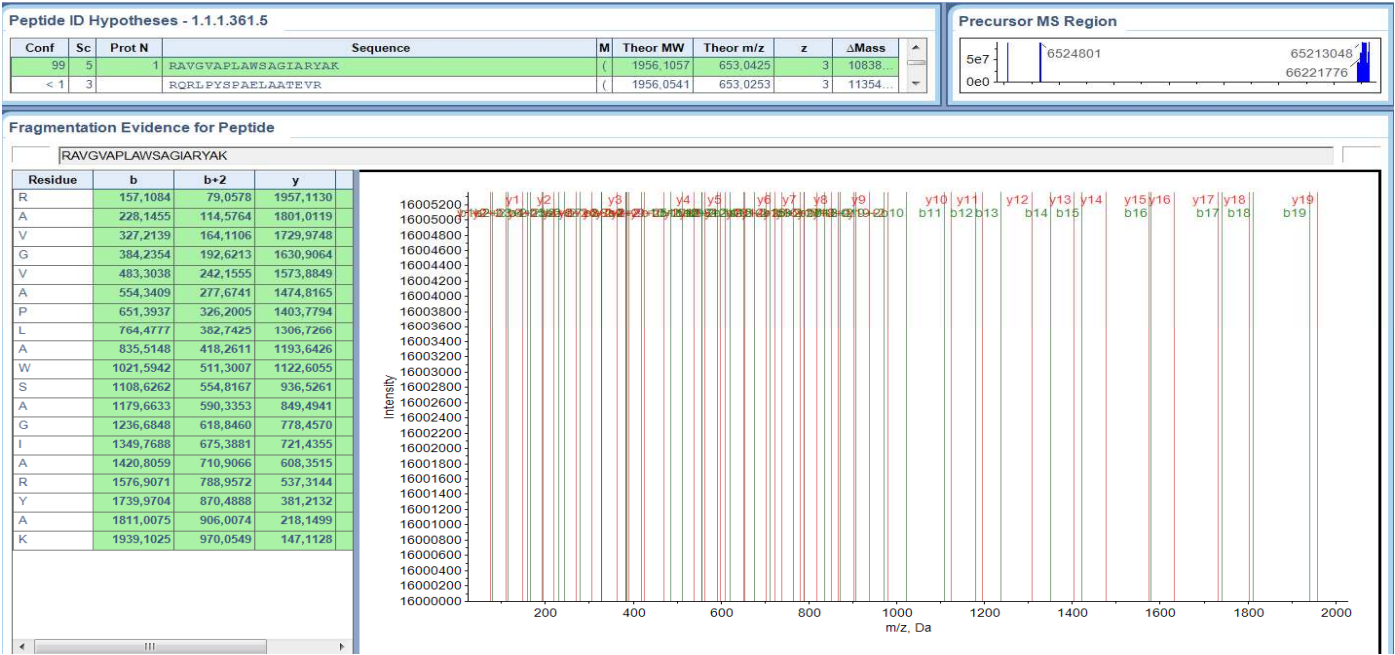

Figure S10: Single-peptide spectra corresponding to de identification of spot 6307.

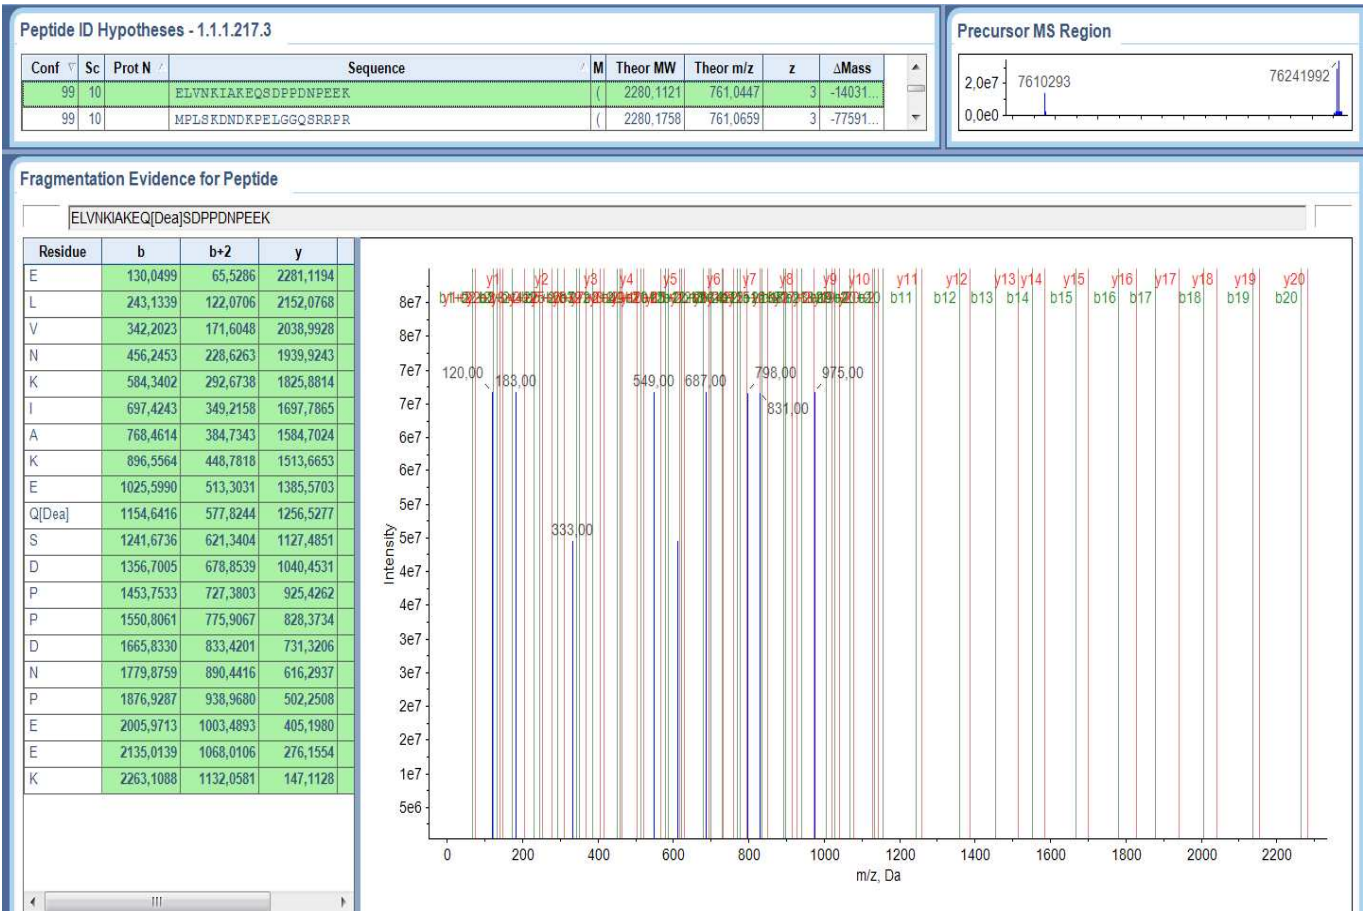



Figure S11: Single-peptide spectra corresponding to de identification of spot 6804.

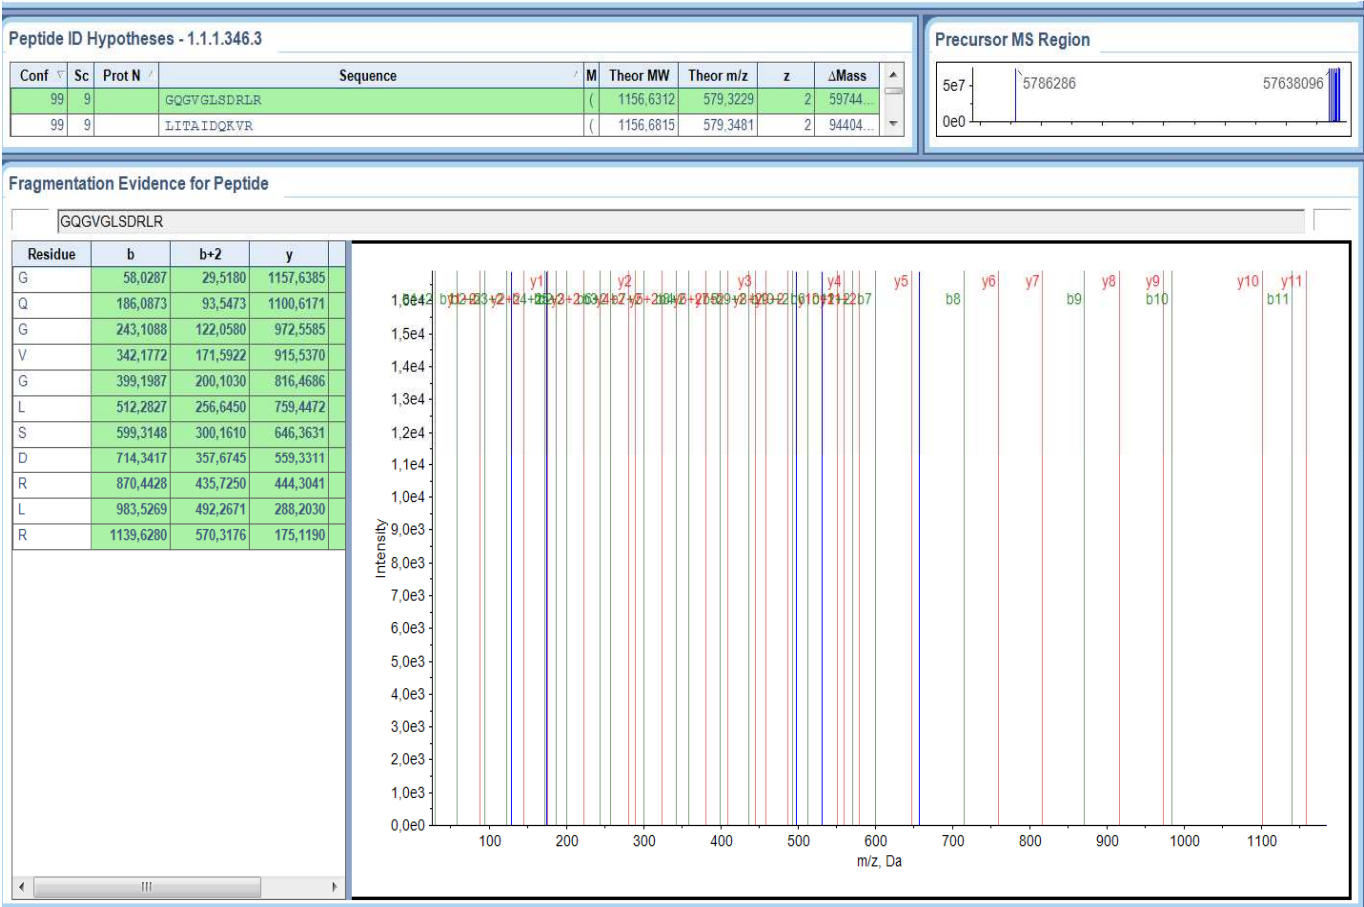

Figure S12: Single-peptide spectra corresponding to de identification of spot 8803.

Peptide ID Hypotheses - 1.1.1.336.3

| Conf | Sc | Prot N | Sequence      | M | Theor MW  | Theor m/z | z | ΔMass     |
|------|----|--------|---------------|---|-----------|-----------|---|-----------|
| 99   | 9  | 1      | AYGEAANVFGAPK | ( | 1293.6354 | 647.8250  | 2 | 76048...  |
| < 1  | 4  | 7      | ENQFGVERESK   | ( | 1293.6201 | 647.8173  | 2 | 91304...  |
| < 1  | 6  |        | AYGEAANVFGAPK | ( | 1294.6194 | 648.3170  | 2 | -90796... |
| < 1  | 5  |        | FSEKNQMGQPK   | ( | 1293.6023 | 647.8085  | 2 | 10906...  |
| < 1  | 4  |        | LYRTEDDRIE    | ( | 1293.6426 | 647.8286  | 2 | 68837     |

Precursor MS Region

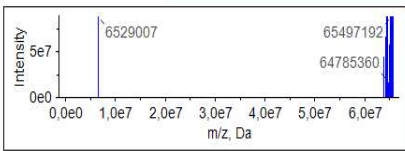

Fragmentation Evidence for Peptide

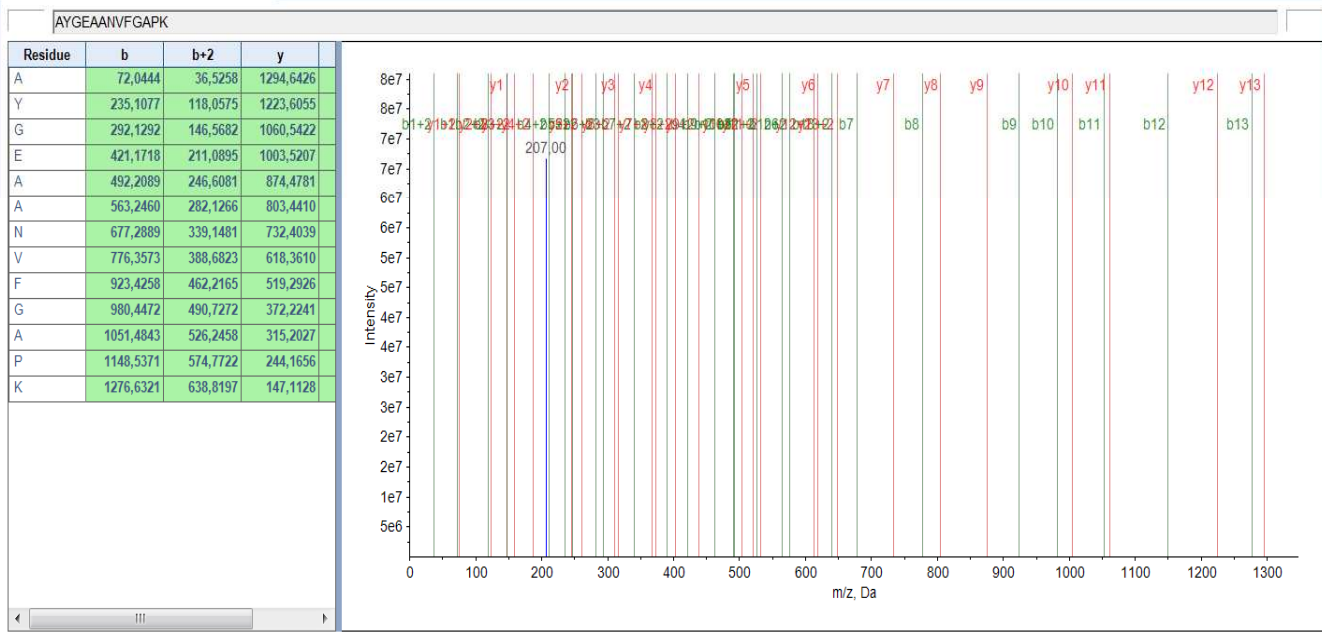

Supplement: Supplementary file 1 [file 4424275]
